# Supplementary material
Source: PubMed Central journal article supplement (PMC2707242)

### Supplemental Figure Legend

**FIG. 1S.** Expression of WT-ER $\alpha$  and  $\Delta$ 7-ER $\alpha$  in SHSY5Y Cells. (A) RT-PCR of SHSY5Y cDNA followed 1% agarose gel electrophoresis. Bands corresponding to exon 7 containing transcripts are 310 bp. Bands corresponding to exon 7-skipped transcripts are 126 bp. Note that the transcripts with exon 7 missing seem to be more abundant by end-point PCR. (B) MCF-7 and SHSY5Y total cell lysates were separated by SDS-PAGE and immunoprobed with ER $\alpha$  antibody (Novocastra Laboratories LTD. cat# NCL-L-ER-6F11). Bands corresponding to molecular weight sizes reported for WT-ER $\alpha$  and smaller ER $\alpha$  immunopositive bands are indicated. Note that the smaller ER $\alpha$  immunoreactive bands appear more prominent than WT-ER $\alpha$ . \* Possible  $\Delta$ 7-ER $\alpha$  migrating ~45kDa; # possible  $\Delta$ 5-ER $\alpha$  migrating ~42kDa. Image contrast has been enhanced to increase prominence of bands.

Figure 1S

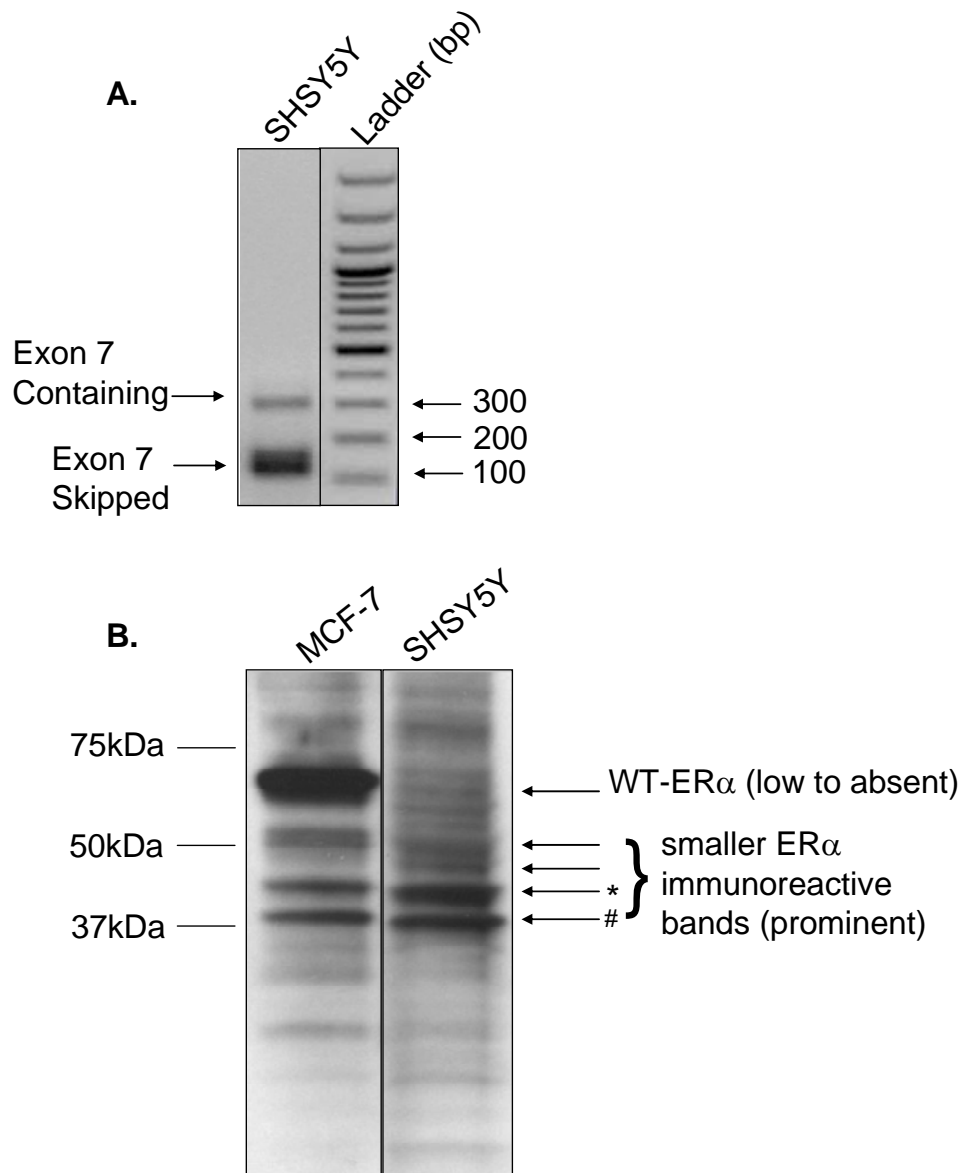

Supplement: supp_M109.013243_Suppdata.pdf [file supp_M109.013243_Suppdata.pdf]
